# Supplementary material
Source: PubMed Central journal article supplement (PMC8678165)
Supplement: NIHMS1726214-supplement-1.pdf [file NIHMS1726214-supplement-1.pdf]

**Supplemental Table 1****Comorbidities**

---

| <b>Diagnosis</b>                      | <b>ICD-9 Diagnostic/Procedure Code</b>                                                                                                                      |
|---------------------------------------|-------------------------------------------------------------------------------------------------------------------------------------------------------------|
| Heart failure                         | 428.xx, 402.01, 402.11, 402.91, 404.01, 404.03, 404.11, 404.13, 404.91, 404.93                                                                              |
| Diabetes mellitus                     | 250.XX, 357.2X, 326.0X, 362.07                                                                                                                              |
| Alcohol Dependence                    | 291.XX, 303.XX, 305.0X                                                                                                                                      |
| Coronary artery disease               | 410.XX-413.XX, 00.66, 36.03, 36.04, 36.09, 36.06, 36.07, 36.1X, 36.2X                                                                                       |
| Chronic obstructive pulmonary disease | 490.XX, 491.XX, 492.XX, 494.XX, 496.XX                                                                                                                      |
| Cerebral vascular disease             | 433.X1, 434.X1, 435.XX, 436.XX, 437.1X, 437.9X                                                                                                              |
| Cerebral bleed                        | 430, 431, 432.x                                                                                                                                             |
| Cancer                                | 14X.XX-208.XX (excluding 173.XX)                                                                                                                            |
| Hypertension                          | 401.XX, 402.XX, 405.XX                                                                                                                                      |
| Valvular heart disease                | 093.2X, 394.XX-397.XX, 424.XX, 746.3X-746.6X, V42.2, V43.3                                                                                                  |
| Peripheral arterial disease           | 093.0X, 437.3X, 440.XX, 441.XX, 443.1X, 443.2X, 443.8X, 443.9X, 447.1X, 557.1X, 557.9X, V43.4, 84.1X, 84.3X                                                 |
| Other previous solid organ transplant | V42.1 (heart), V42.6 (lung), V42.7 (liver), V42.83 (pancreas)                                                                                               |
| Liver disease                         | 070.22, 070.23, 070.32, 070.33, 070.44, 070.54, 070.6X, 070.9X, 456.0X-456.2X, 570.XX, 571.XX, 572.2X-572.4X, 572.8X, 573.3X, 573.4X, 573.8X, 573.9X, V42.7 |
| Tobacco use                           | 305.1x                                                                                                                                                      |
| Arrhythmia                            | 426.0X, 426.13, 426.7X, 426.9X, 426.10, 426.12, 427.0X-427.4X, 427.6X, 427.8X, 427.9X, 785.0X, 996.01, 996.04, V45.0, V53.3                                 |

---
